# Supplementary material for: The Therapeutic Efficacy of Curcumin vs. Metformin in Modulating the Gut Microbiota in NAFLD Rats: A Comparative Study
Source: PubMed Central journal article supplement (PMC7874275; doi:10.3389/fmicb.2020.555293), 2021-01-14

## Supplementary Materials

Figure S1: Histological analysis of HFD-induced hepatic steatosis.

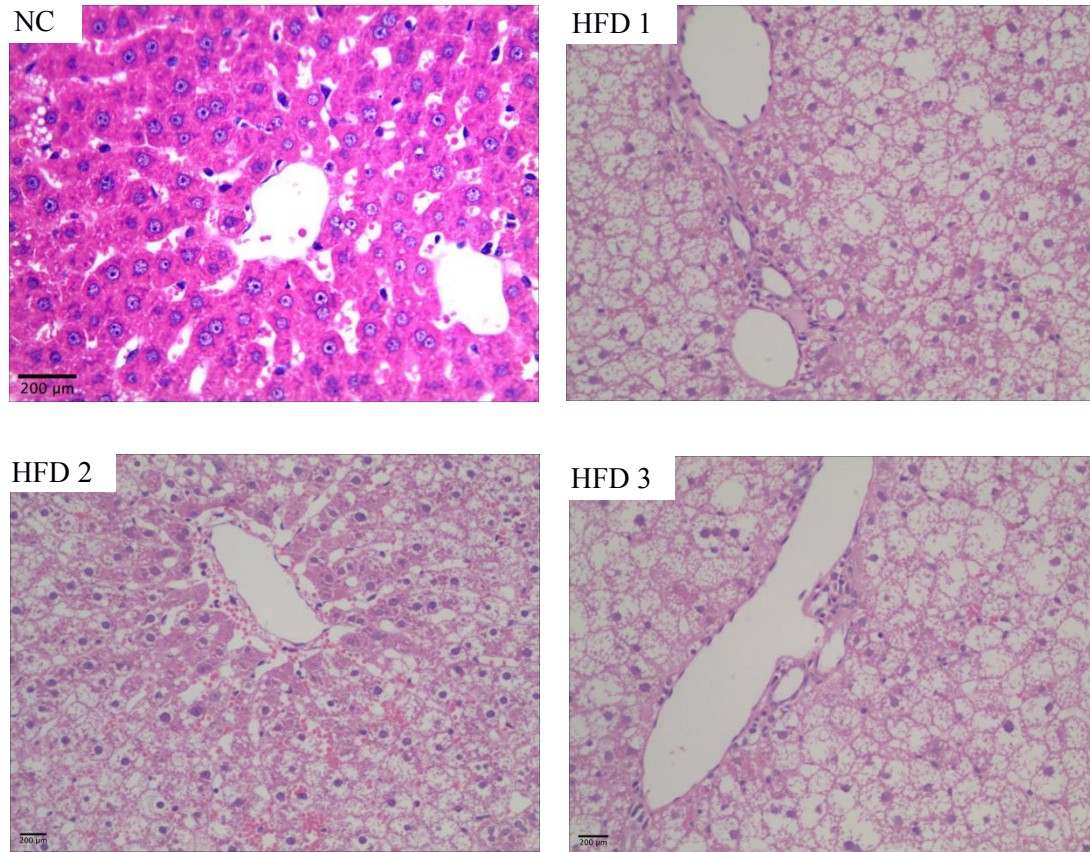

the HE-stained liver tissue(400X)

Table S1: NAFLD activity score of the liver tissue under HFD -induced obesity

| Parameters                    | NC | HFD 1 | HFD 2 | HFD 3 |
|-------------------------------|----|-------|-------|-------|
| Steatosis (0-2)               | 0  | 2     | 1     | 2     |
| Lobular inflammation (0-3)    | 0  | 1     | 2     | 1     |
| Ballooning degeneration (0-2) | 0  | 2     | 1     | 2     |
| Total NAS(0-8)                | 0  | 5     | 4     | 5     |

Table S2: The community coverage index of each fece sample.

| Feeding Method | Time | Sample ID        | 0.97<br>(The operational taxonomic units(OTUs) that reached a 97% nucleotide similarity level) |                  |                    |                           |                     |                           |
|----------------|------|------------------|------------------------------------------------------------------------------------------------|------------------|--------------------|---------------------------|---------------------|---------------------------|
|                |      |                  | OTU                                                                                            | ace              | chao               | coverage                  | shannon             | simpson                   |
| HFD            | OW   | C011             | 613                                                                                            | 705<br>(677,747) | 708<br>(672,765)   | 0.996432                  | 4.57<br>(4.55,4.59) | 0.0337<br>(0.0327,0.0347) |
|                |      | C012             | 536                                                                                            | 647<br>(614,695) | 631<br>(596,687)   | 0.995405                  | 4.4<br>(4.38,4.42)  | 0.0276<br>(0.027,0.0282)  |
|                |      | C014             | 659                                                                                            | 748<br>(720,787) | 776<br>(733,845)   | 0.996755                  | 4.56<br>(4.54,4.58) | 0.0302<br>(0.0295,0.031)  |
|                |      | C015             | 666                                                                                            | 766<br>(736,808) | 783<br>(741,848)   | 0.99577                   | 4.71<br>(4.69,4.73) | 0.0225<br>(0.0219,0.023)  |
|                |      | C06              | 685                                                                                            | 798<br>(766,844) | 786<br>(750,841)   | 0.996595                  | 4.51<br>(4.49,4.52) | 0.03<br>(0.0293,0.0306)   |
|                |      | C07              | 605                                                                                            | 714<br>(681,760) | 736<br>(688,812)   | 0.995905                  | 4.33<br>(4.3,4.35)  | 0.052<br>(0.0505,0.0536)  |
|                |      | H013             | 800                                                                                            | 895<br>(866,935) | 897<br>(862,951)   | 0.99832                   | 4.7<br>(4.69,4.71)  | 0.0228<br>(0.0224,0.0231) |
|                |      | H016             | 630                                                                                            | 718<br>(690,757) | 711<br>(680,760)   | 0.99876                   | 3.91<br>(3.9,3.93)  | 0.0507<br>(0.0501,0.0513) |
|                |      | H019             | 696                                                                                            | 823<br>(788,871) | 829<br>(784,898)   | 0.997879                  | 3.56<br>(3.55,3.58) | 0.0847<br>(0.0835,0.0859) |
|                |      | H024             | 738                                                                                            | 879<br>(840,932) | 897<br>(843,979)   | 0.997984                  | 4.2<br>(4.19,4.21)  | 0.0464<br>(0.0457,0.0471) |
|                |      | H08              | 640                                                                                            | 729<br>(702,769) | 713<br>(686,757)   | 0.997989                  | 4.04<br>(4.03,4.06) | 0.0545<br>(0.0536,0.0555) |
|                |      | H09              | 799                                                                                            | 870<br>(847,903) | 867<br>(840,911)   | 0.999264                  | 4.32<br>(4.31,4.33) | 0.0356<br>(0.0352,0.036)  |
|                |      | M017             | 645                                                                                            | 762<br>(728,809) | 784<br>(736,858)   | 0.995393                  | 4.33<br>(4.31,4.35) | 0.0439<br>(0.0427,0.0452) |
|                |      | M02              | 670                                                                                            | 811<br>(772,864) | 825<br>(773,904)   | 0.994945                  | 4.61<br>(4.59,4.63) | 0.0256<br>(0.025,0.0263)  |
|                |      | M020             | 610                                                                                            | 773<br>(729,833) | 751<br>(705,819)   | 0.994687                  | 4.01<br>(3.99,4.04) | 0.0529<br>(0.0517,0.0542) |
|                |      | M022             | 598                                                                                            | 723<br>(687,774) | 735<br>(687,809)   | 0.994609                  | 4.48<br>(4.46,4.5)  | 0.0272<br>(0.0265,0.0278) |
| M023           | 564  | 678<br>(645,725) | 678<br>(638,741)                                                                               | 0.992933         | 4.38<br>(4.35,4.4) | 0.0353<br>(0.034,0.0366)  |                     |                           |
| M05            | 663  | 753<br>(726,792) | 777<br>(736,843)                                                                               | 0.996721         | 4.32<br>(4.3,4.33) | 0.0457<br>(0.0445,0.0469) |                     |                           |

|     |     |      |     |                  |                  |          |                     |                           |
|-----|-----|------|-----|------------------|------------------|----------|---------------------|---------------------------|
| HFD | 10W | H713 | 596 | 698<br>(667,742) | 693<br>(658,748) | 0.998062 | 3.67<br>(3.65,3.69) | 0.0777<br>(0.0766,0.0789) |
|     |     | H716 | 587 | 687<br>(656,732) | 682<br>(646,738) | 0.998541 | 3.96<br>(3.94,3.97) | 0.0524<br>(0.0517,0.0532) |
|     |     | H719 | 519 | 631<br>(597,679) | 628<br>(588,691) | 0.997873 | 3.45<br>(3.44,3.47) | 0.0877<br>(0.0863,0.089)  |
|     |     | H724 | 554 | 614<br>(593,646) | 603<br>(582,639) | 0.999112 | 3.73<br>(3.72,3.74) | 0.0941<br>(0.0927,0.0956) |
|     |     | H78  | 734 | 776<br>(760,801) | 776<br>(757,810) | 0.999434 | 4.65<br>(4.64,4.66) | 0.0208<br>(0.0205,0.021)  |
|     |     | H79  | 755 | 856<br>(826,899) | 857<br>(820,914) | 0.998728 | 4.66<br>(4.66,4.67) | 0.0232<br>(0.0229,0.0236) |
|     |     | M717 | 533 | 649<br>(614,700) | 664<br>(616,741) | 0.996636 | 3.98<br>(3.95,4)    | 0.0763<br>(0.0742,0.0784) |
|     |     | M72  | 457 | 547<br>(517,590) | 556<br>(517,621) | 0.997361 | 3.33<br>(3.31,3.35) | 0.1335<br>(0.1308,0.1362) |
|     |     | M720 | 477 | 597<br>(559,652) | 650<br>(583,759) | 0.996316 | 3.72<br>(3.69,3.74) | 0.0921<br>(0.09,0.0943)   |
|     |     | M722 | 536 | 641<br>(608,688) | 671<br>(620,753) | 0.996929 | 4.05<br>(4.03,4.07) | 0.0601<br>(0.0585,0.0617) |
|     |     | M723 | 609 | 762<br>(719,821) | 775<br>(719,859) | 0.994961 | 3.95<br>(3.93,3.98) | 0.0997<br>(0.0968,0.1026) |
|     |     | M75  | 404 | 500<br>(468,549) | 515<br>(470,591) | 0.997715 | 3.31<br>(3.29,3.33) | 0.1255<br>(0.1227,0.1282) |
|     |     | C711 | 548 | 676<br>(639,730) | 685<br>(636,762) | 0.996546 | 3.4<br>(3.37,3.42)  | 0.1609<br>(0.1573,0.1644) |
|     |     | C712 | 453 | 557<br>(523,606) | 556<br>(516,623) | 0.998207 | 3.91<br>(3.9,3.93)  | 0.0414<br>(0.0408,0.0419) |
|     |     | C714 | 535 | 667<br>(627,724) | 704<br>(641,804) | 0.998352 | 3.9<br>(3.89,3.92)  | 0.0615<br>(0.0604,0.0627) |
|     |     | C715 | 392 | 499<br>(463,552) | 497<br>(455,567) | 0.996645 | 3.76<br>(3.75,3.78) | 0.053<br>(0.0519,0.0541)  |
|     |     | C76  | 442 | 555<br>(519,608) | 571<br>(520,655) | 0.997692 | 3.55<br>(3.53,3.58) | 0.0795<br>(0.0781,0.0808) |
|     |     | C77  | 527 | 659<br>(620,715) | 631<br>(594,690) | 0.996501 | 3.92<br>(3.9,3.94)  | 0.0742<br>(0.0723,0.0762) |
| HFD | 14W | H121 | 676 | 747<br>(724,781) | 744<br>(717,788) | 0.998713 | 4.39<br>(4.38,4.4)  | 0.0379<br>(0.0372,0.0387) |
|     |     | H121 | 698 | 785<br>(758,825) | 802<br>(762,865) | 0.998692 | 4.81<br>(4.8,4.82)  | 0.0148<br>(0.0146,0.0149) |
|     |     | H121 | 647 | 763<br>(729,810) | 741<br>(707,793) | 0.997812 | 4.14<br>(4.12,4.15) | 0.0471<br>(0.0463,0.048)  |

|         |     |           |     |                  |                  |          |                     |                           |
|---------|-----|-----------|-----|------------------|------------------|----------|---------------------|---------------------------|
|         |     | H122      | 516 | 600<br>(573,641) | 571<br>(549,608) | 0.998396 | 3.84<br>(3.82,3.85) | 0.0727<br>(0.0713,0.0742) |
|         |     | H128      | 641 | 708<br>(686,742) | 704<br>(678,747) | 0.999044 | 4.57<br>(4.56,4.58) | 0.0217<br>(0.0214,0.0219) |
|         |     | H129      | 567 | 679<br>(646,726) | 677<br>(637,739) | 0.994987 | 4.41<br>(4.39,4.43) | 0.0257<br>(0.0252,0.0263) |
| HFD+MET | 14W | M121<br>7 | 566 | 667<br>(636,712) | 695<br>(647,772) | 0.996125 | 4.1<br>(4.08,4.12)  | 0.066<br>(0.0641,0.068)   |
|         |     | M122      | 524 | 622<br>(592,665) | 615<br>(581,670) | 0.996002 | 3.65<br>(3.62,3.68) | 0.1324<br>(0.1287,0.136)  |
|         |     | M122<br>0 | 585 | 679<br>(650,722) | 685<br>(647,744) | 0.995785 | 4.68<br>(4.66,4.71) | 0.0297<br>(0.0286,0.0308) |
|         |     | M122<br>2 | 536 | 654<br>(619,704) | 663<br>(617,735) | 0.994444 | 4.08<br>(4.06,4.11) | 0.0578<br>(0.0561,0.0594) |
|         |     | M122<br>3 | 637 | 742<br>(710,786) | 751<br>(710,817) | 0.996033 | 4.48<br>(4.46,4.5)  | 0.0355<br>(0.0345,0.0365) |
|         |     | M125      | 577 | 693<br>(659,742) | 706<br>(659,779) | 0.995431 | 4.22<br>(4.19,4.24) | 0.0599<br>(0.0579,0.0619) |
| HFD+CUR | 14W | C121      | 595 | 712<br>(677,762) | 742<br>(688,825) | 0.996522 | 4.14<br>(4.12,4.16) | 0.0693<br>(0.0674,0.0713) |
|         |     | C121      | 609 | 694<br>(667,734) | 729<br>(682,806) | 0.997252 | 4.85<br>(4.84,4.86) | 0.0156<br>(0.0153,0.0159) |
|         |     | C121      | 615 | 716<br>(685,760) | 730<br>(688,798) | 0.995364 | 4.91<br>(4.89,4.93) | 0.0142<br>(0.0139,0.0145) |
|         |     | C121      | 609 | 683<br>(659,719) | 687<br>(656,737) | 0.997038 | 5.06<br>(5.05,5.07) | 0.0109<br>(0.0107,0.0111) |
|         |     | C126      | 651 | 743<br>(715,783) | 733<br>(702,783) | 0.996218 | 4.77<br>(4.75,4.78) | 0.0237<br>(0.0229,0.0245) |
|         |     | C127      | 647 | 771<br>(736,820) | 784<br>(736,858) | 0.994986 | 4.52<br>(4.5,4.54)  | 0.044<br>(0.0424,0.0455)  |

The two numbers surrounded by parentheses are minimal and maximal degrees output by multiple analyses.

Figure S2: The Alpha diversity of each group. (A) The observer OTUs of each group. (B) The ace index of each group. (C) The chao index of each group. (D) The shannon index of each group. (E)The simpson index of each group.

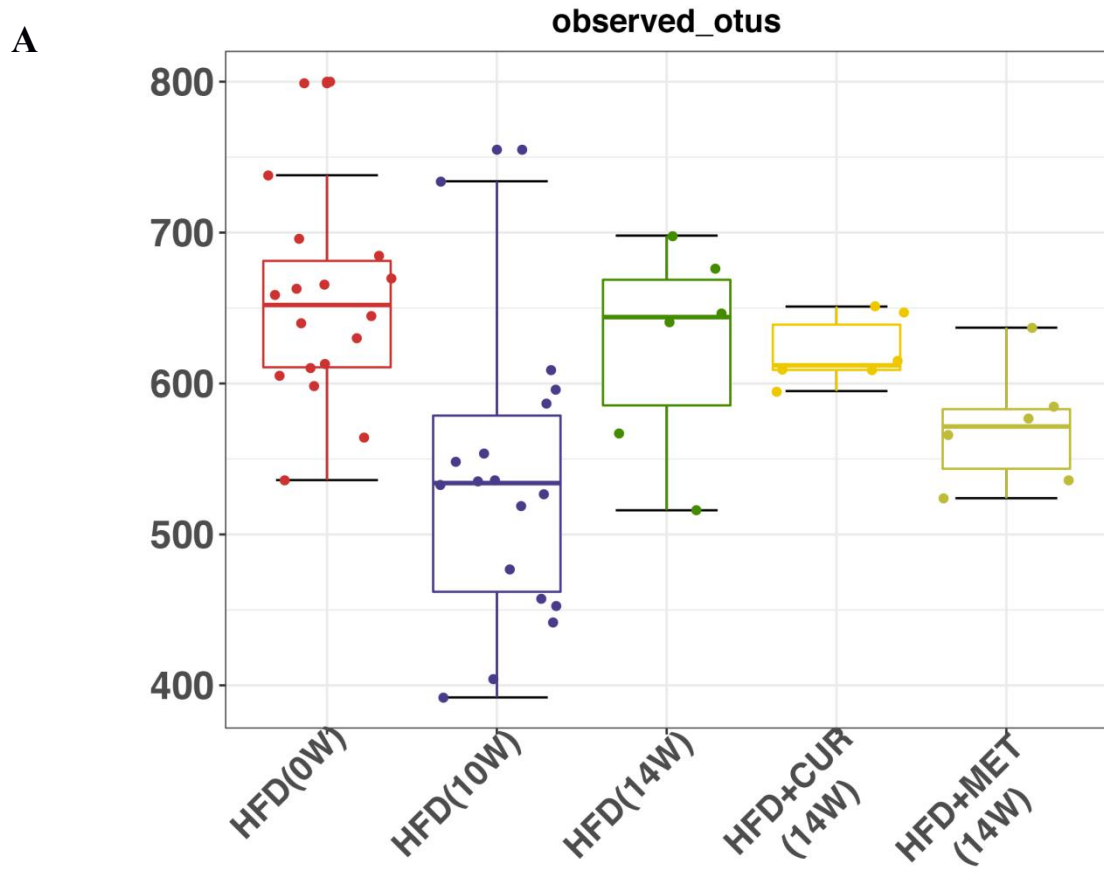

**B**

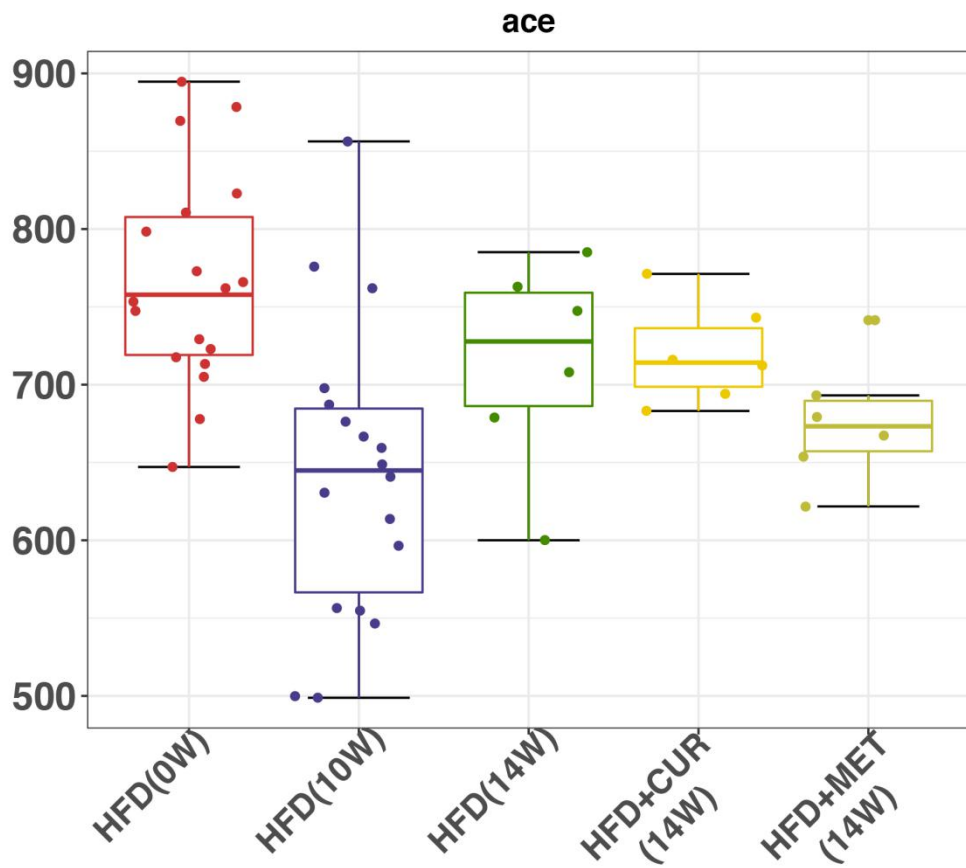

**C**

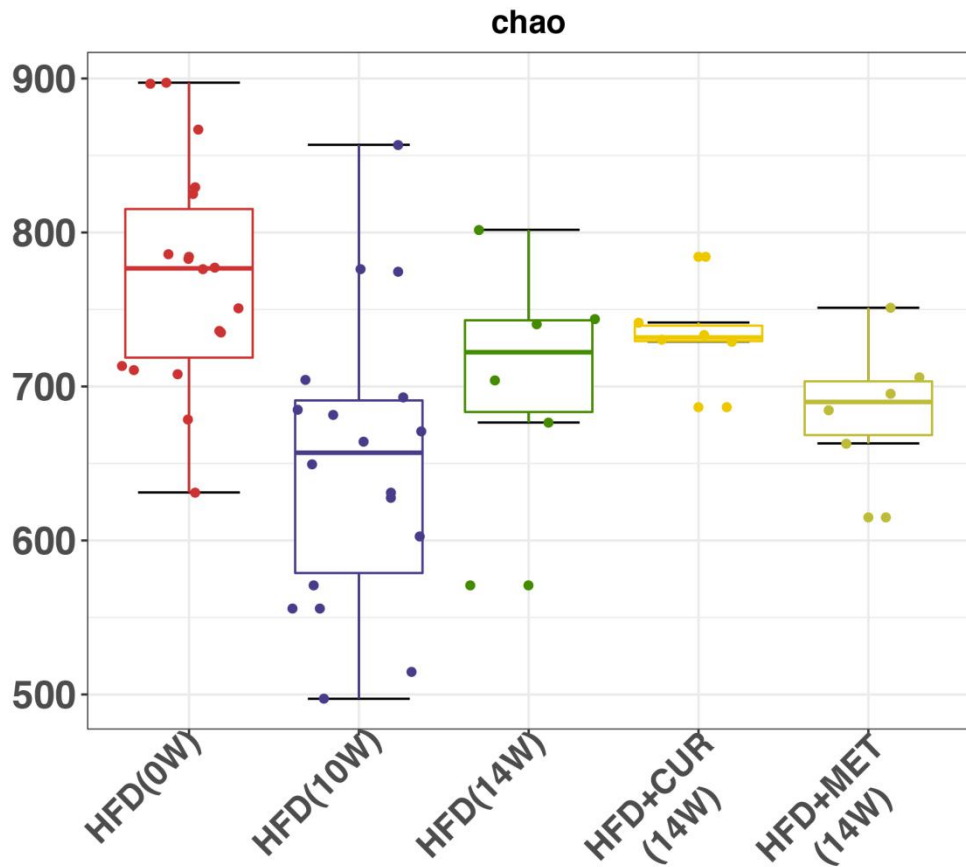

**D**

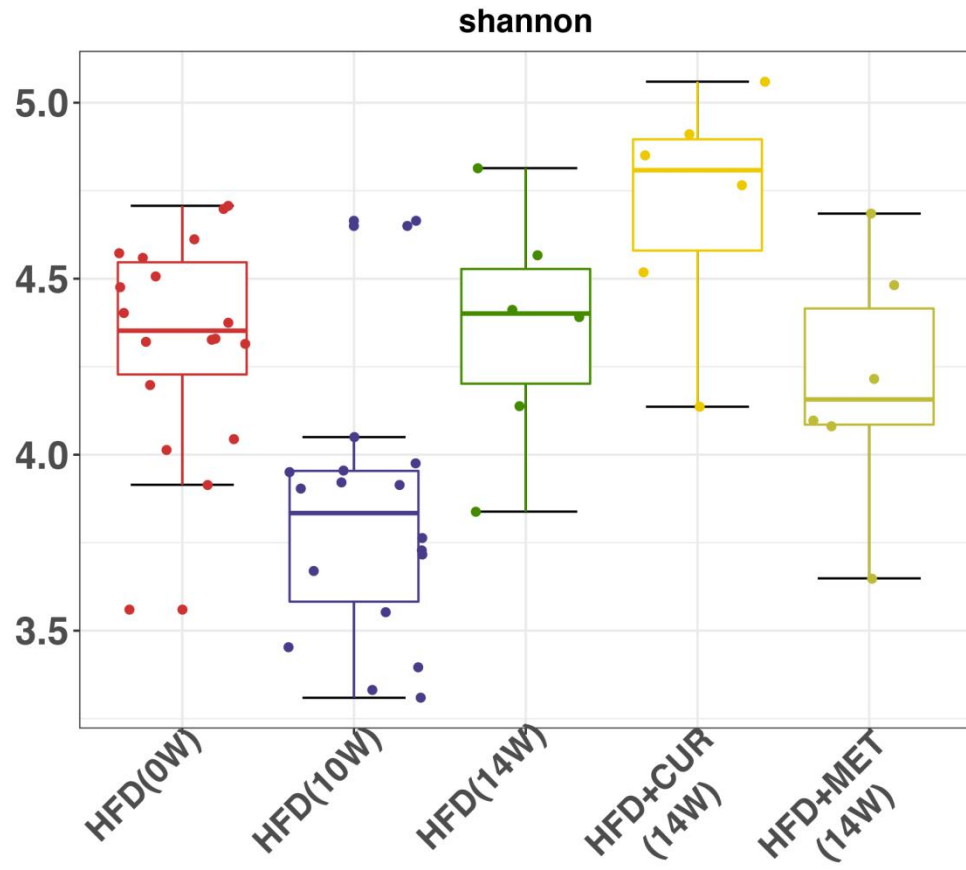

**E**

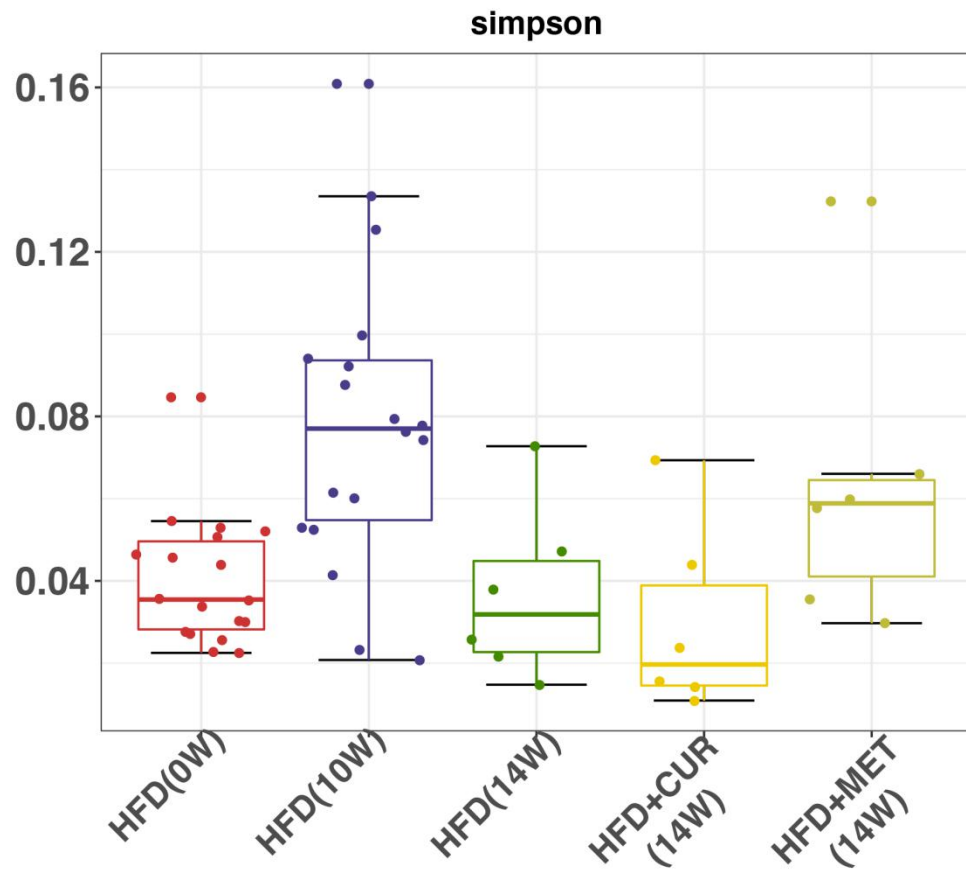

Figure S3: The rarefaction curves and Shannon curves of each fece sample.

(A) The rarefaction curves of each fece sample. (B) The Shannon curves of each fece sample.

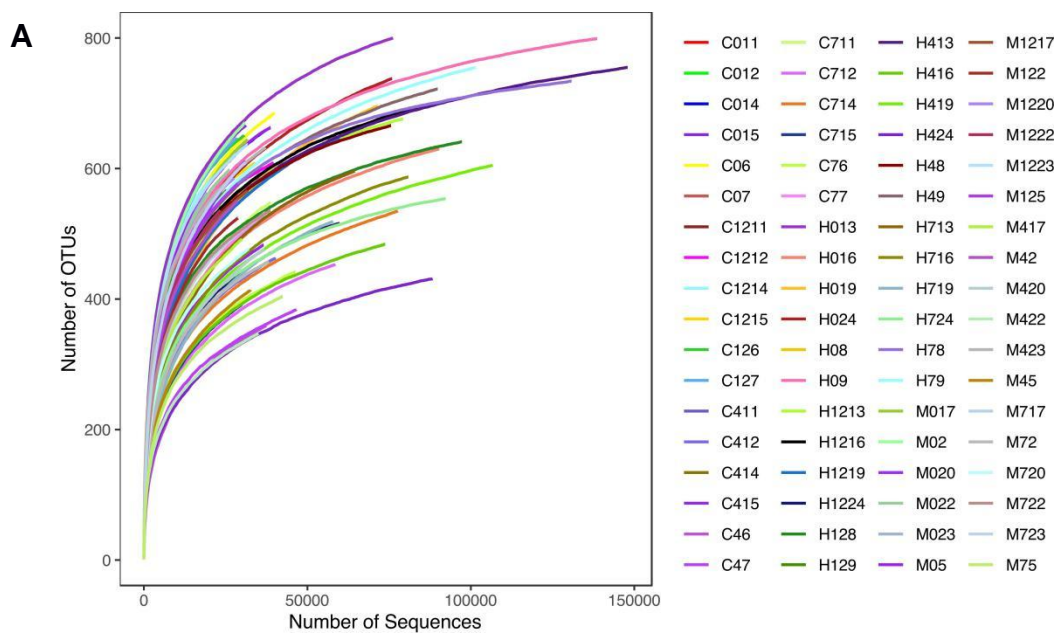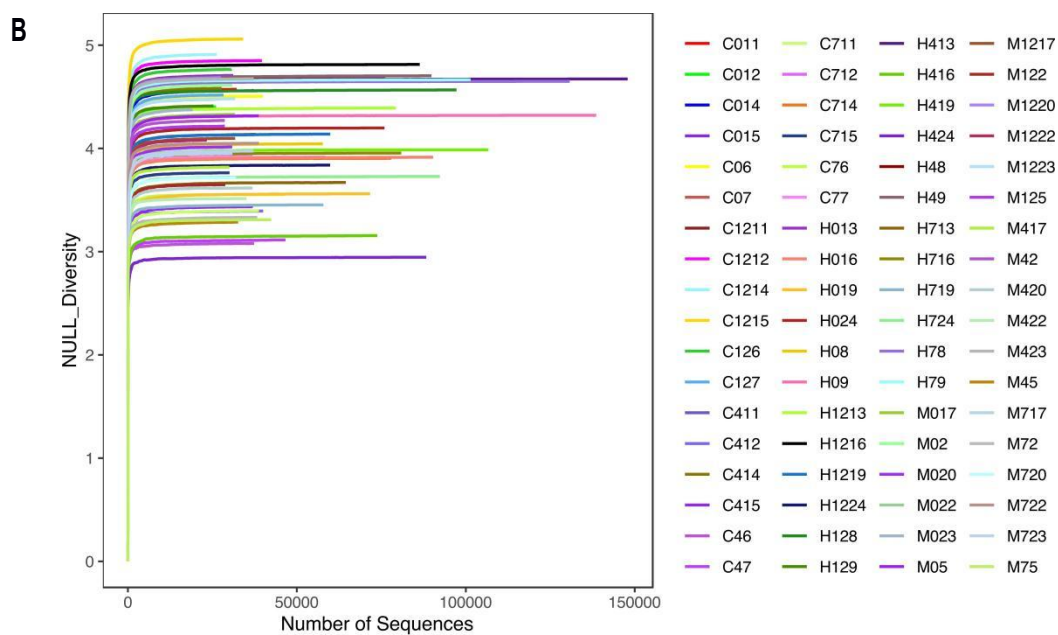



Figure S4: PCoA score plot based on weighted Unifrac metrics.

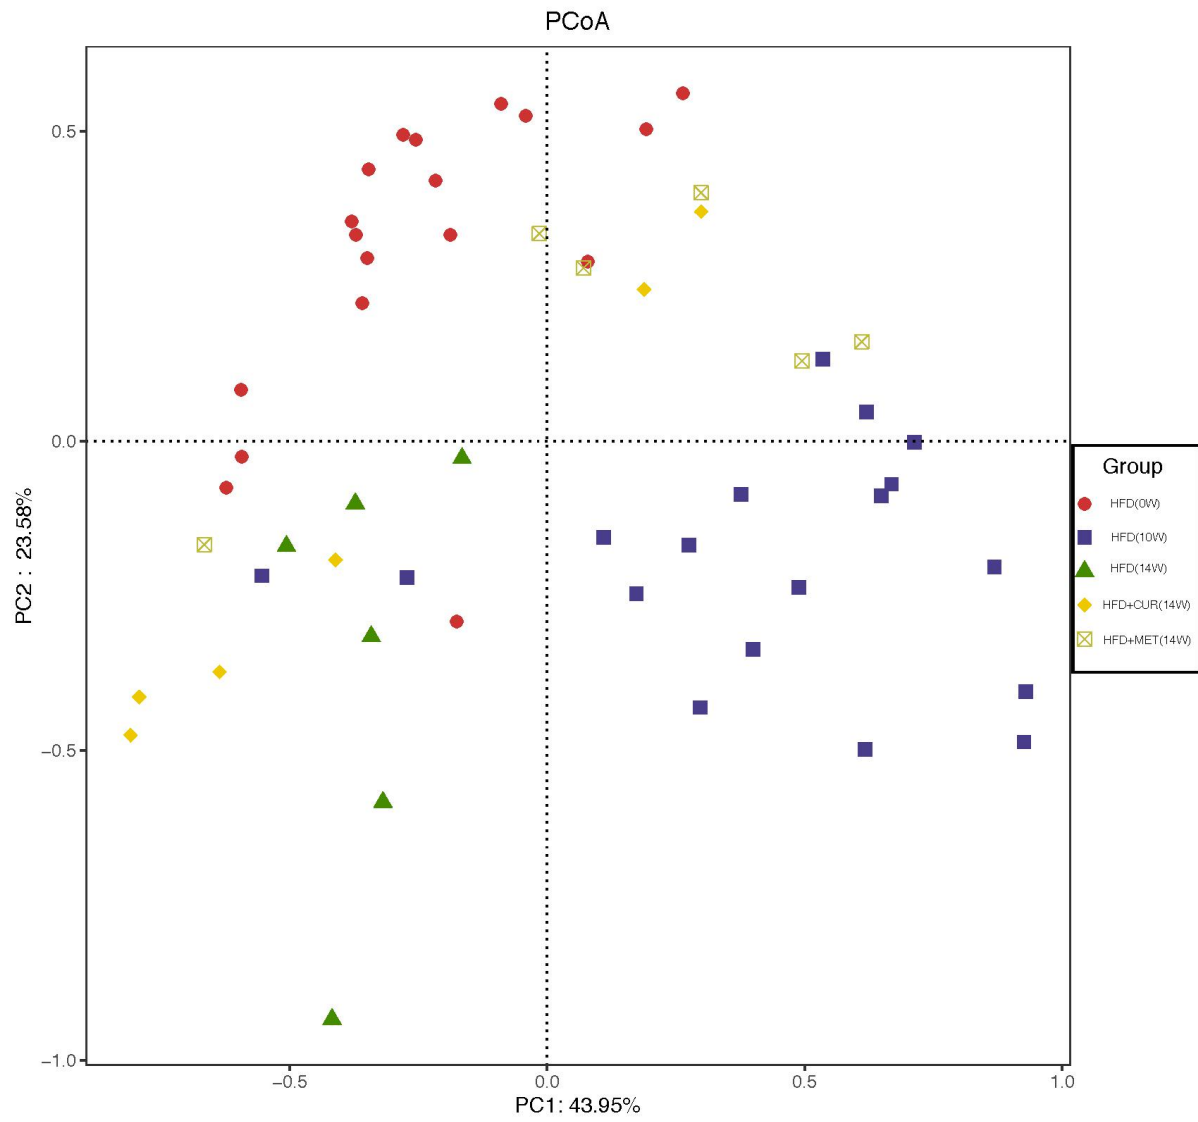

Figure S5: Heatmap of the abundance the OTUs in the HFD(0W), HFD (10W), HFD (14W), HFD+CUR(14W) and HFD+MET(14W) groups.

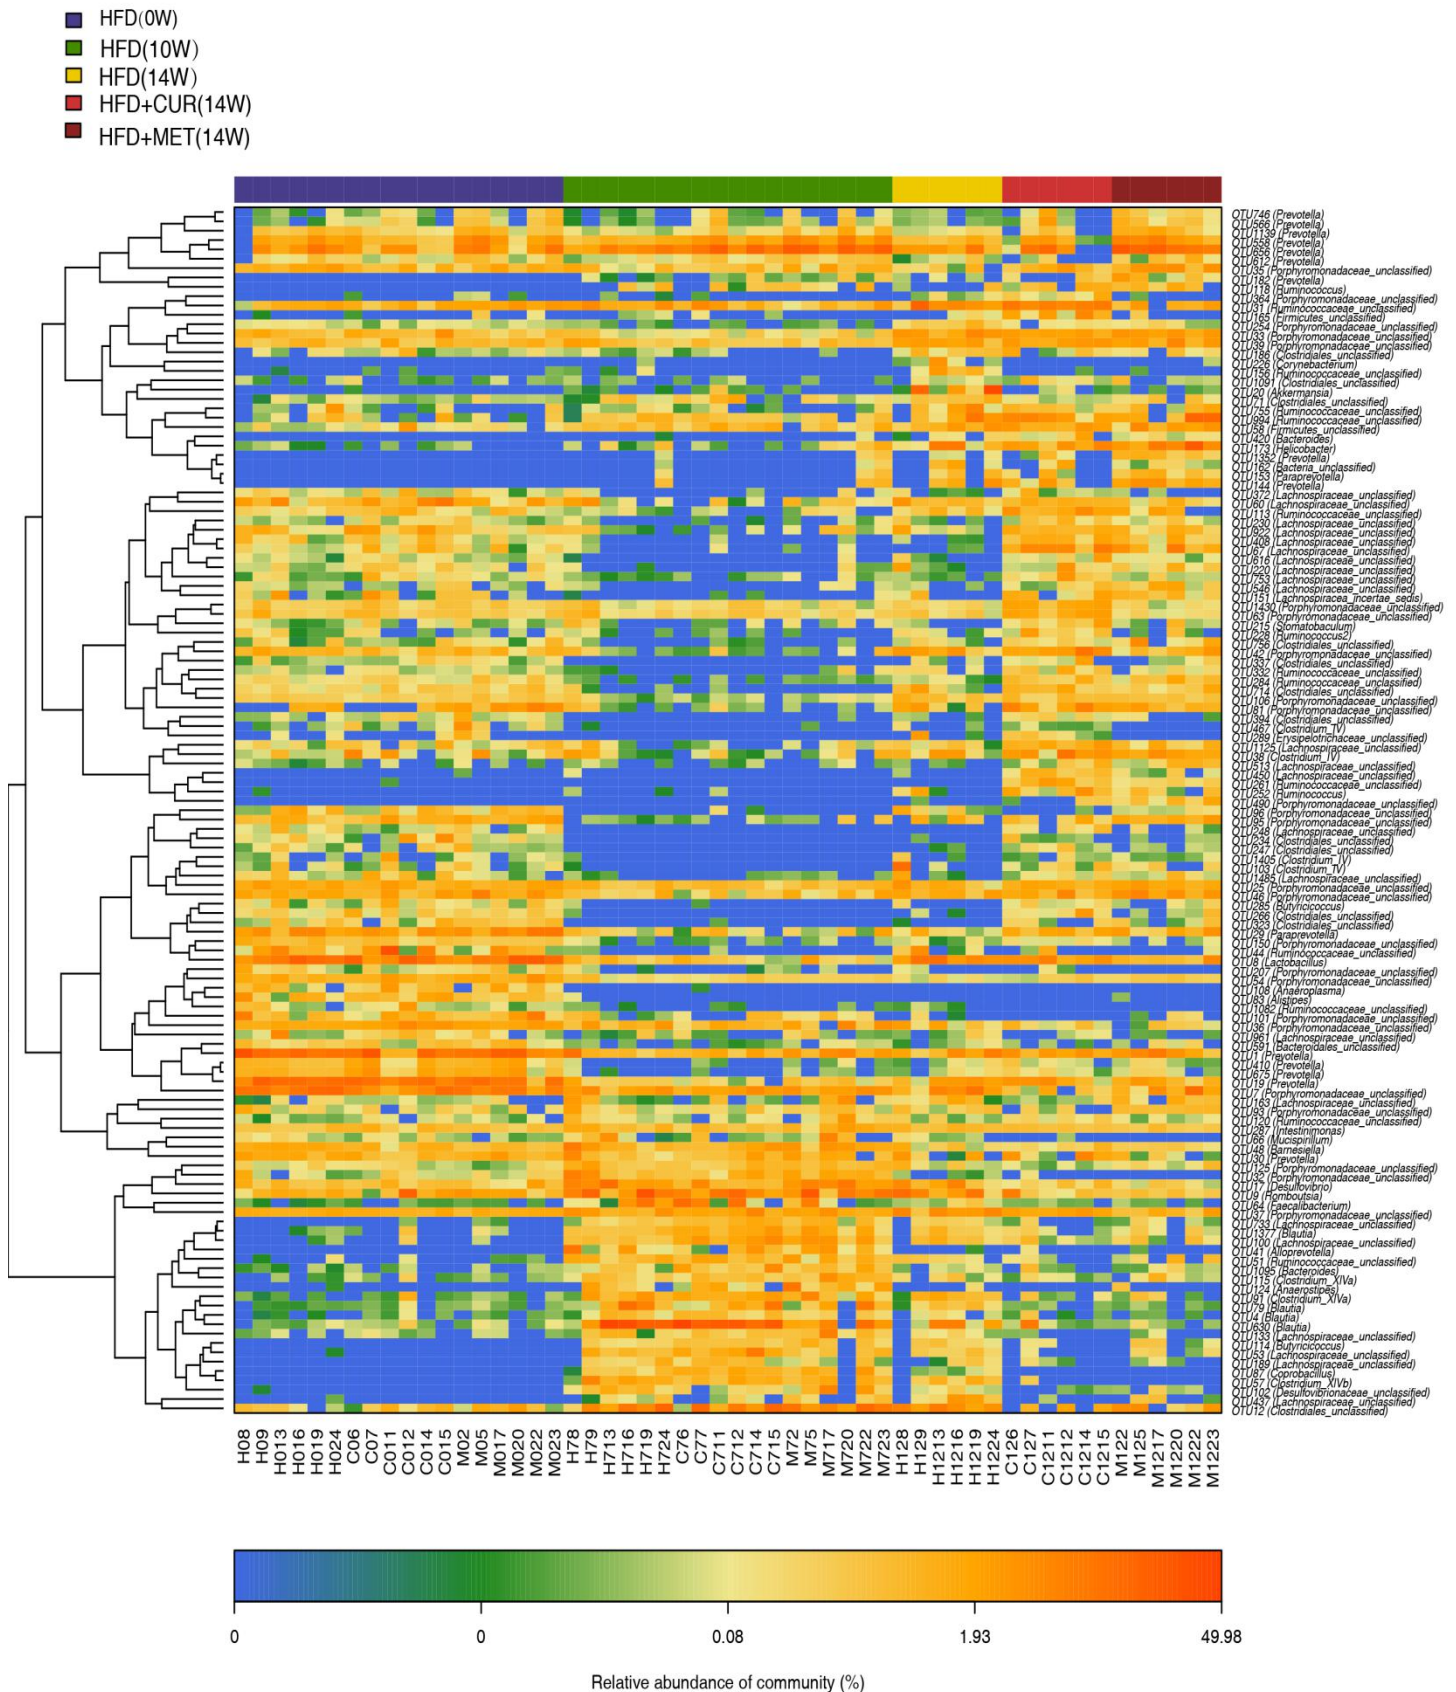

Supplement: Data_Sheet_1.pdf [file Data_Sheet_1.pdf]
